# Supplementary material
Source: Research Square preprint supplement (doi:10.21203/rs.3.rs-9493183/v1)
Supplement: Supplementary file 1 [file 12844e7098cf1881cd7e93b1.pdf]

**Table S1: Performance of PepBridge on peptide immunogenicity (IMM) and MHC-peptide binding prediction under different  $R'_P$  alignment settings during training.**

| setting   | MP_independent<br>AUC | MP_independent<br>AUPR | MP_external<br>AUC | MP_external<br>AUPR | IMM<br>AUC | IMM<br>AUPR |
|-----------|-----------------------|------------------------|--------------------|---------------------|------------|-------------|
| no_align  | 0.97                  | 0.94                   | 0.94               | 0.95                | 0.80       | 0.76        |
| align1    | 0.97                  | 0.94                   | 0.94               | 0.94                | 0.81       | 0.77        |
| align1_In | 0.97                  | 0.94                   | 0.94               | 0.94                | 0.81       | 0.78        |
| align2    | 0.97                  | 0.94                   | 0.93               | 0.94                | 0.80       | 0.77        |
| align2_In | 0.97                  | 0.94                   | 0.94               | 0.95                | 0.81       | 0.77        |
| align3    | 0.97                  | 0.95                   | 0.93               | 0.94                | 0.80       | 0.77        |
| align3_In | 0.97                  | 0.94                   | 0.94               | 0.95                | 0.81       | 0.77        |

align1, align2 and align3: alignment on the last 1, 2 or all 3 layers of  $R'_P$  in  $R_{MP}$  and  $R_{PT}$ , respectively; In: layer normalization before alignment; independent: independent test dataset; external: external test dataset.

**Table S2: Performance of PepBridge on MHC-peptide residue contact and distance prediction under different  $R'_P$  alignment settings during training.**

| setting   | MP_contact<br>AUC | MP_contact<br>AUPR | MP_distance<br>MSE | MP_distance<br>MAPE | MP_distance<br>Pearson | MP_distance<br>Spearman |
|-----------|-------------------|--------------------|--------------------|---------------------|------------------------|-------------------------|
| no_align  | 0.97              | 0.82               | 1.69               | 0.14                | 0.97                   | 0.96                    |
| align1    | 0.97              | 0.80               | 1.66               | 0.14                | 0.97                   | 0.96                    |
| align1_In | 0.97              | 0.83               | 1.61               | 0.13                | 0.97                   | 0.96                    |
| align2    | 0.96              | 0.78               | 2.17               | 0.16                | 0.97                   | 0.96                    |
| align2_In | 0.97              | 0.81               | 1.69               | 0.14                | 0.97                   | 0.96                    |
| align3    | 0.97              | 0.83               | 1.57               | 0.13                | 0.97                   | 0.96                    |
| align3_In | 0.97              | 0.82               | 1.63               | 0.13                | 0.97                   | 0.96                    |

align1, align2 and align3: alignment on the last 1, 2 or all 3 layers of  $R'_P$  in  $R_{MP}$  and  $R_{PT}$ , respectively; In: layer normalization before alignment.

**Table S3: Performance of PepBridge on MHC-peptide-TCR binding prediction under different  $R'_P$  alignment settings during training.**

| setting   | MPT_independent | MPT_independent | MPT_benchmark | MPT_benchmark |
|-----------|-----------------|-----------------|---------------|---------------|
|           | AUC             | AUPR            | AUC           | AUPR          |
| no_align  | 0.88            | 0.69            | 0.98          | 0.98          |
| align1    | 0.89            | 0.71            | 0.98          | 0.97          |
| align1_In | 0.89            | 0.72            | 0.98          | 0.96          |
| align2    | 0.89            | 0.71            | 0.98          | 0.97          |
| align2_In | 0.89            | 0.71            | 0.98          | 0.97          |
| align3    | 0.89            | 0.72            | 0.97          | 0.96          |
| align3_In | 0.89            | 0.72            | 0.98          | 0.97          |

align1, align2 and align3: alignment on the last 1, 2 or all 3 layers of  $R'_P$  in  $R_{MP}$  and  $R_{PT}$ , respectively; In: layer normalization before alignment.

**Table S4: Performance of PepBridge on peptide-TCR residue contact and distance prediction of post-2022 test dataset under different  $R'_P$  alignment settings during training.**

| setting   | PT_contact | PT_contact | PT_distance | PT_distance | PT_distance | PT_distance |
|-----------|------------|------------|-------------|-------------|-------------|-------------|
|           | AUC        | AUPR       | MSE         | MAPE        | Pearson     | Spearman    |
| no_align  | 0.93       | 0.48       | 7.27        | 0.22        | 0.92        | 0.92        |
| align1    | 0.94       | 0.50       | 6.64        | 0.20        | 0.93        | 0.93        |
| align1_In | 0.94       | 0.52       | 6.81        | 0.20        | 0.93        | 0.92        |
| align2    | 0.94       | 0.48       | 7.08        | 0.20        | 0.92        | 0.92        |
| align2_In | 0.94       | 0.49       | 6.60        | 0.20        | 0.93        | 0.93        |
| align3    | 0.94       | 0.52       | 6.31        | 0.20        | 0.93        | 0.93        |
| align3_In | 0.94       | 0.48       | 6.88        | 0.21        | 0.93        | 0.92        |

align1, align2 and align3: alignment on the last 1, 2 or all 3 layers of  $R'_P$  in  $R_{MP}$  and  $R_{PT}$ , respectively; In: layer normalization before alignment.

**Table S5: Performance of PepBridge on MHC-peptide and peptide-TCR binding prediction under different  $R'_P$  alignment settings without structural conformation task.**

| setting   | MP_independent<br>AUC | MP_independent<br>AUPR | MP_external<br>AUC | MP_external<br>AUPR | PT_random<br>AUC | PT_random<br>AUPR | PT_hybrid<br>AUC | PT_hybrid<br>AUPR | PT_benchmark<br>AUC | PT_benchmark<br>AUPR |
|-----------|-----------------------|------------------------|--------------------|---------------------|------------------|-------------------|------------------|-------------------|---------------------|----------------------|
| no_align  | 0.97                  | 0.94                   | 0.93               | 0.94                | 0.74             | 0.62              | 0.77             | 0.68              | 0.65                | 0.69                 |
| align1    | 0.97                  | 0.93                   | 0.94               | 0.94                | 0.75             | 0.64              | 0.79             | 0.70              | 0.65                | 0.69                 |
| align1_In | 0.97                  | 0.94                   | 0.93               | 0.94                | 0.76             | 0.65              | 0.78             | 0.70              | 0.69                | 0.73                 |
| align2    | 0.97                  | 0.93                   | 0.92               | 0.93                | 0.75             | 0.63              | 0.77             | 0.68              | 0.64                | 0.68                 |
| align2_In | 0.97                  | 0.94                   | 0.94               | 0.94                | 0.76             | 0.65              | 0.77             | 0.69              | 0.65                | 0.69                 |
| align3    | 0.97                  | 0.94                   | 0.93               | 0.94                | 0.76             | 0.65              | 0.78             | 0.70              | 0.68                | 0.71                 |
| align3_In | 0.97                  | 0.94                   | 0.93               | 0.94                | 0.77             | 0.66              | 0.78             | 0.70              | 0.67                | 0.71                 |

align1, align2 and align3: alignment on the last 1, 2 or all 3 layers of  $R'_P$  in  $R_{MP}$  and  $R_{PT}$ , respectively; In: layer normalization before alignment; independent: independent test dataset; external: external test dataset; random, hybrid and benchmark: prediction on the random\_mismatch, hybrid\_strategy and third-party benchmark test dataset, respectively.

**Figure S1**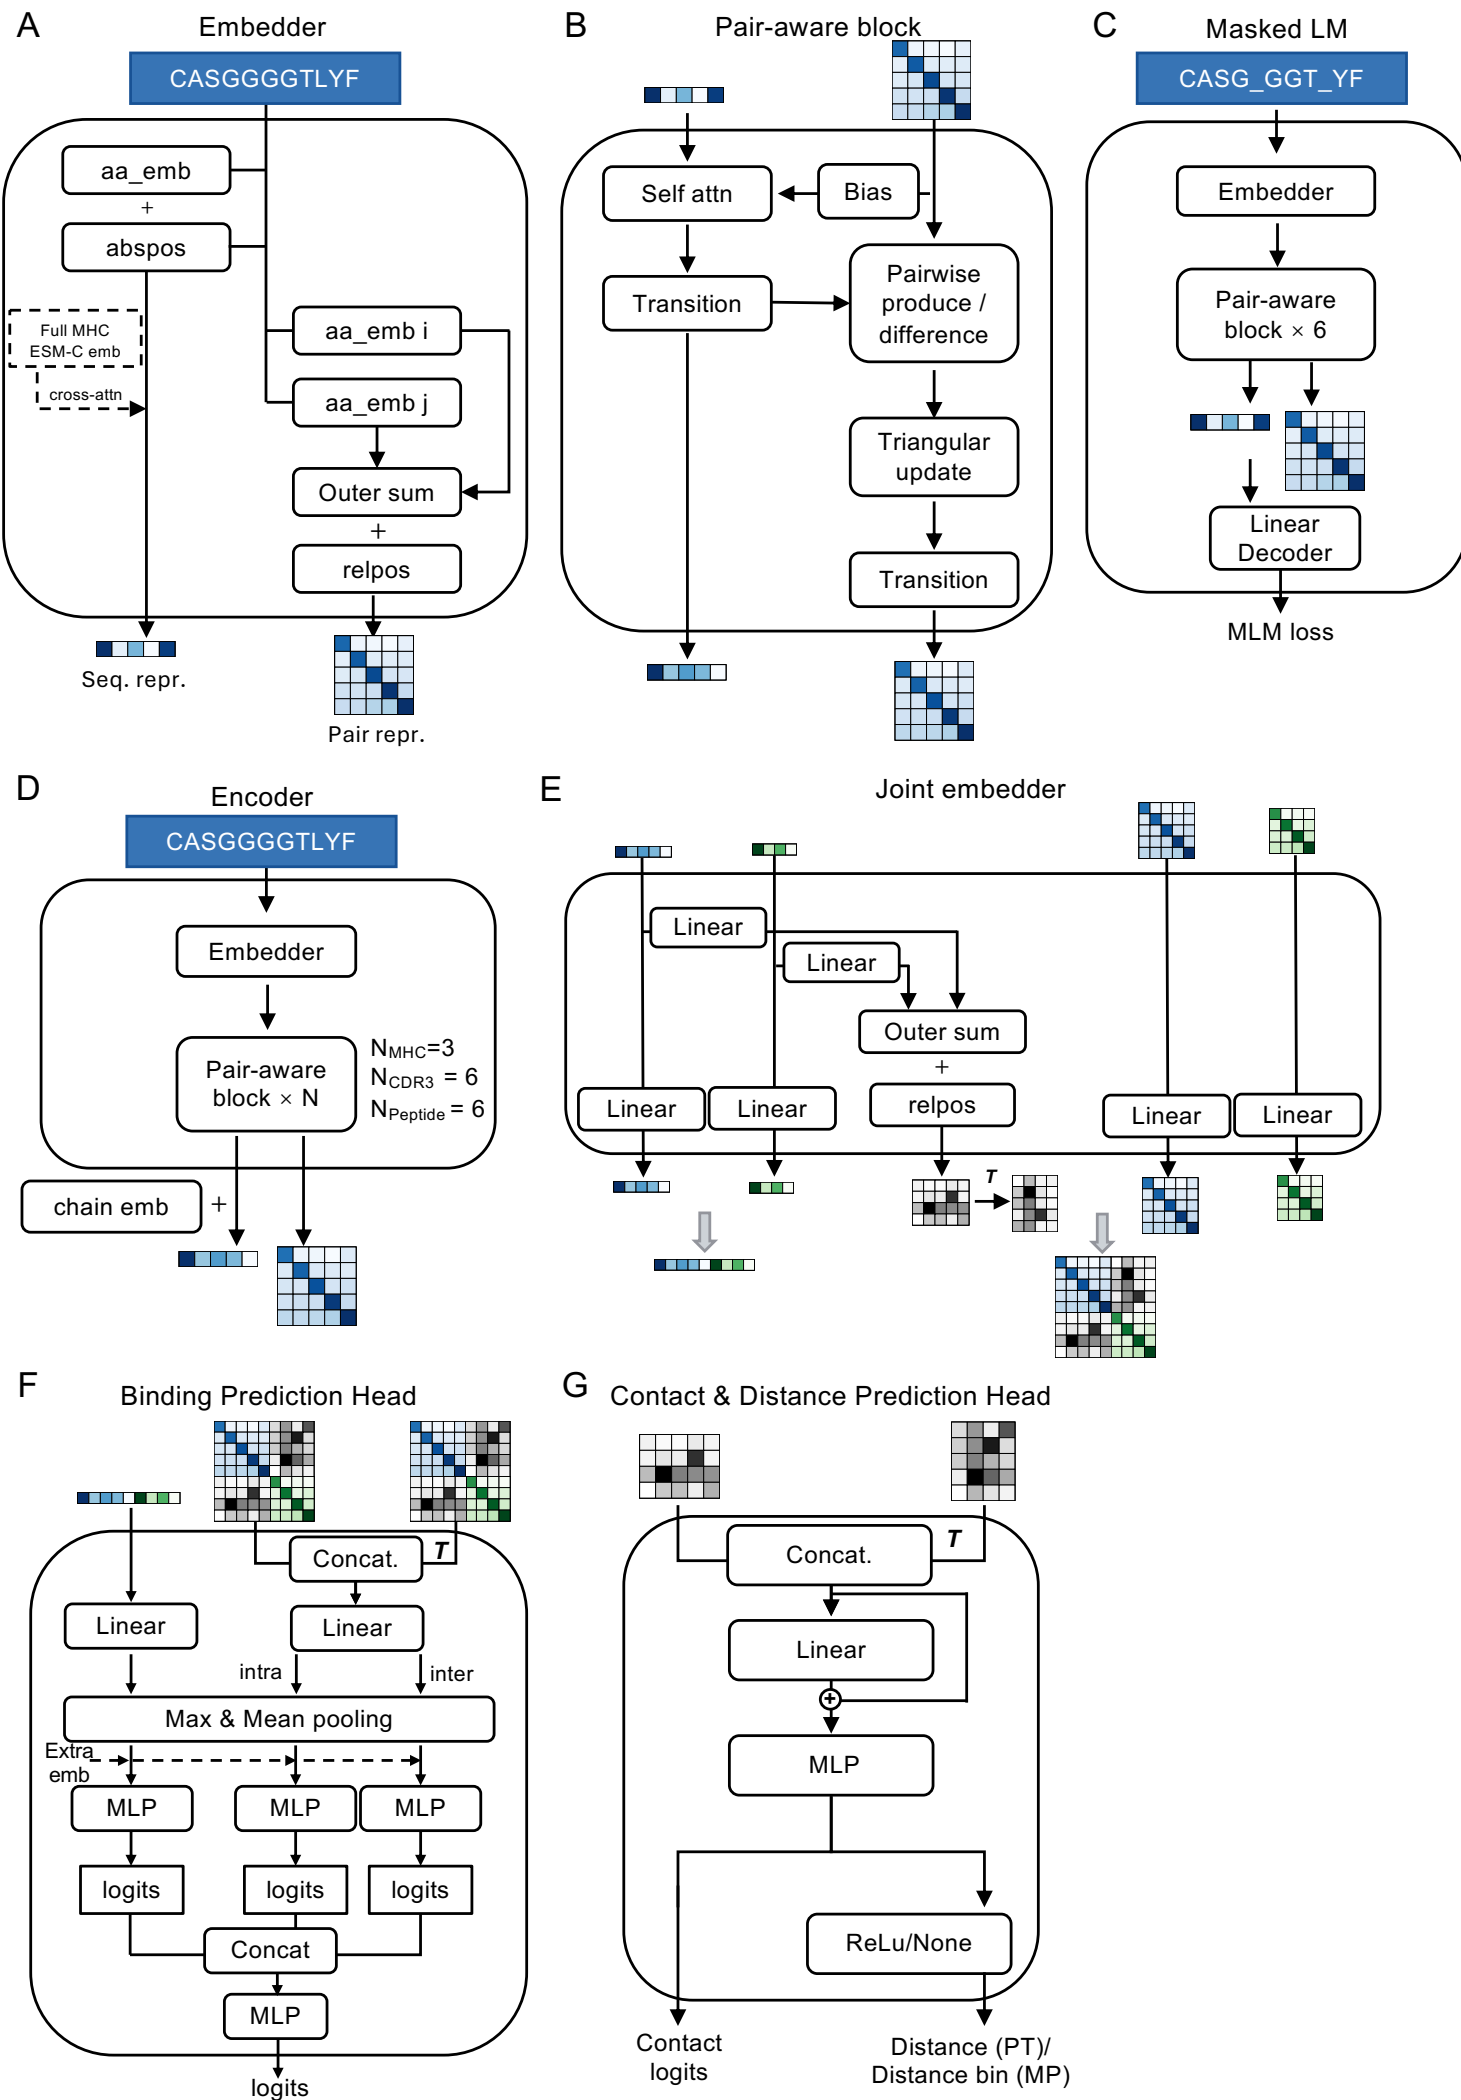

**Figure S2**

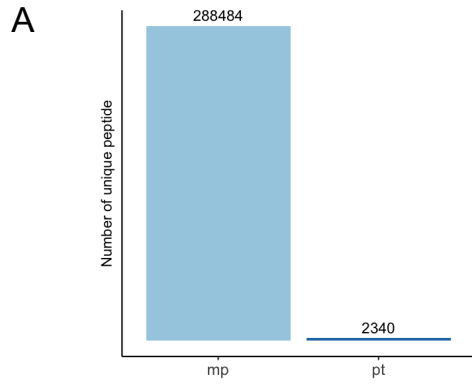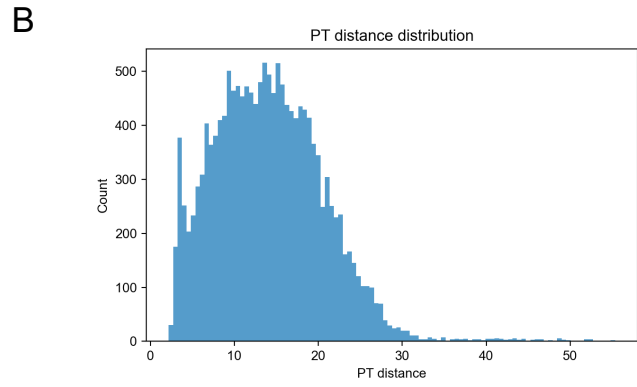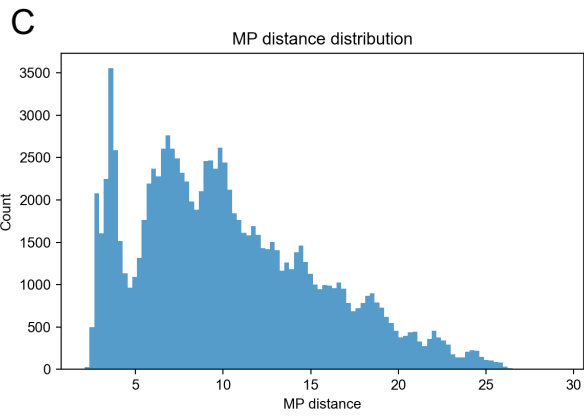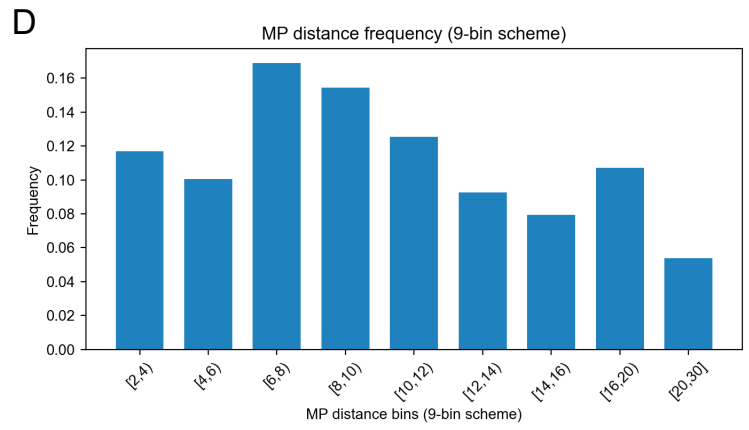

**Figure S3**

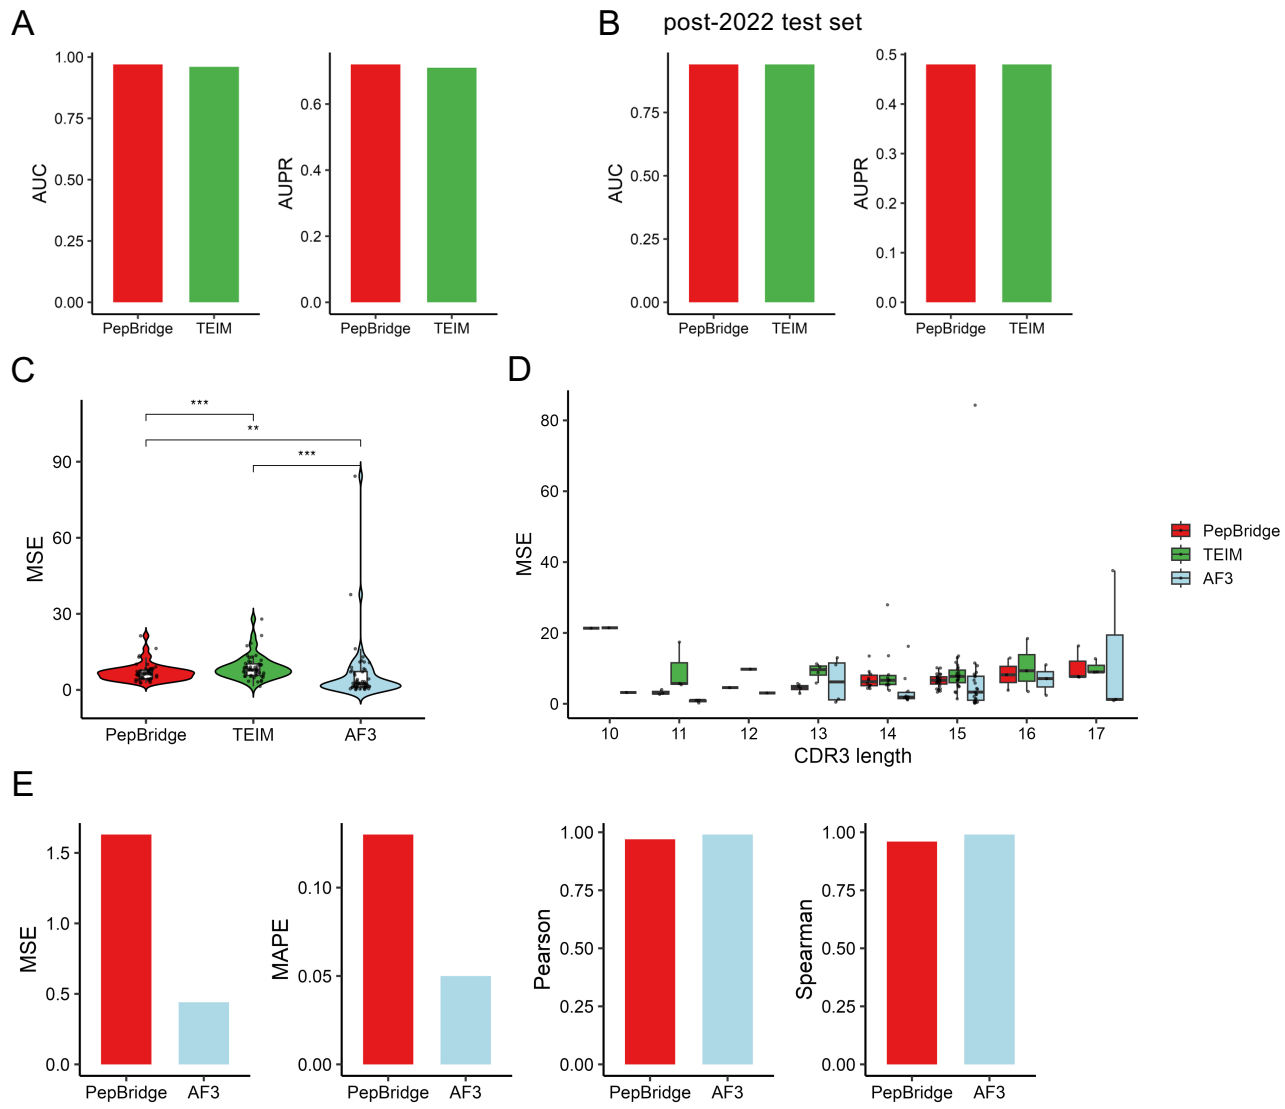

**Figure S4**

**A**

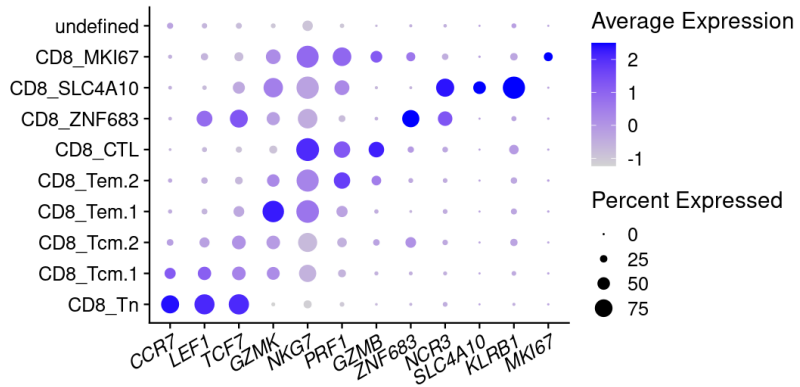

**B**

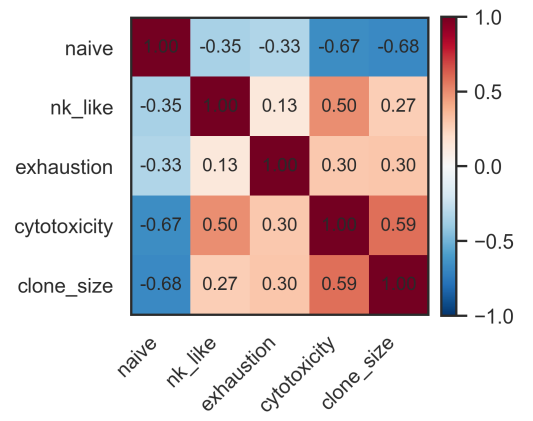

### Supplementary tables:

**Table S1: Performance of PepBridge on peptide immunogenicity (IMM) and MHC-peptide binding prediction under different  $R'_P$  alignment settings during training.**

**Table S2: Performance of PepBridge on MHC-peptide residue contact and distance prediction under different  $R'_P$  alignment settings during training.**

**Table S3: Performance of PepBridge on MHC-peptide-TCR binding prediction under different  $R'_P$  alignment settings during training.**

**Table S4: Performance of PepBridge on peptide-TCR residue contact and distance prediction of post-2022 test dataset under different  $R'_P$  alignment settings during training.**

**Table S5: Performance of PepBridge on MHC-peptide and peptide-TCR binding prediction under different  $R'_P$  alignment settings without structural conformation task.**

### Supplementary figure legends:

**Figure S1: Detailed architecture of the subunits of PepBridge.**

A-G: Diagram illustration of amino acid sequence Embedder (A), Pair-aware block (B), Masked protein language model (C), amino acid sequence Encoder (D), amino acid sequence Joint embedder (E), Binding Prediction Head (F) and Contact & Distance Prediction Head (G), respectively. aa: amino acid; emb: embedding; abspos: absolute position; attn: attention; relpos: relative position; Seq.: sequence; repr.: representation; Concat: Concatenate; MLP: Multi-Layer Perceptron.

**Figure S2: Statistics of data distribution.**

A: Bar chart for comparing the number of unique MHC-peptide and peptide-TCR data pairs. mp: MHC-peptide; pt: peptide-TCR. B: Histogram of peptide-TCR residue distance. C: Histogram of MHC-peptide residue distance. D: Bar chart of binned MHC-peptide distance frequency.

**Figure S3: Additional performance comparison between PepBridge and other existing tools.**

A: Bar charts for comparing AUC (left) and AUPR (right) between PepBridge and TEIM on MHC-peptide contact map prediction. B: Same as A, but for the post-2022 test dataset. C: Violin plots showing the MSE distribution on the post-2022 test dataset for PepBridge, TEIM, and AF3. Each dot represents one test sample. Statistical significance was assessed using paired Wilcoxon signed-rank tests (\*\* $P < 0.01$ , \*\*\* $P < 0.001$ ). D: Box plots showing MSE on the post-2022 test dataset stratified by CDR3 $\beta$  length for PepBridge, TEIM, and AF3. E: From left to right, bar charts for comparing MSE, MAPE, Pearson's correlation and Spearman's correlation values between PepBridge and AlphaFold3 on MHC-peptide residue distance prediction.

**Figure S4: Additional characterization of the CD8+ T cells in 10x\_200k dataset.**

A: Dot plot of marker genes for the defined T cell clusters in the 10x\_200k dataset. B: Heatmap visualization of pair-wise Spearman's correlations between distinct T cell functional scores and TCR clone size for T cells in the 10x\_200k dataset.
